# Supplementary material
Source: publisher site journal article supplement (https://www.degruyterbrill.com/publication/isbn/9783110363296/downloadAsset/9783110363296_Inhalt.pdf)
Supplement: Supplementary file 1 [file 9783110363296_Inhalt.pdf]

# Inhalt

|          |                                                                                     |
|----------|-------------------------------------------------------------------------------------|
| <b>1</b> | <b>Einleitung und Überblick — 1</b>                                                 |
| <b>2</b> | <b>Forschungszusammenhang — 5</b>                                                   |
| 2.1      | Die Voraussetzungen – Individuen in unterschiedlichen Welten — 5                    |
| 2.2      | Verstehen im ärztlichen Gespräch — 7                                                |
| 2.3      | Der Handlungsrahmen ärztlicher Gespräche — 16                                       |
| 2.4      | Forschung zu prädiagnostischen Mitteilungen und Gegenstandsbestimmungen — 24        |
| 2.5      | Die Daten — 29                                                                      |
| <b>3</b> | <b>Fallanalyse 1: „Finger“ (BI_03) — 30</b>                                         |
| <b>4</b> | <b>Medizinische Inhalte und Linguistika von prädiagnostischen Mitteilungen — 38</b> |
| 4.1      | Medizinische Inhalte prädiagnostischer Mitteilungen — 38                            |
| 4.1.1    | Befunde — 39                                                                        |
| 4.1.2    | Ätiologische Zusammenhänge — 40                                                     |
| 4.1.3    | Ausschlussdiagnosen — 42                                                            |
| 4.1.4    | Vorläufige Diagnosen — 43                                                           |
| 4.2      | Linguistische Eigenschaften prädiagnostischer Mitteilungen — 45                     |
| 4.2.1    | Äußerungsmodus prädiagnostischer Mitteilungen — 45                                  |
| 4.2.2    | Pragmatische Funktionen prädiagnostischer Mitteilungen — 48                         |
| 4.2.3    | Modalisierung von prädiagnostischen Mitteilungen — 52                               |
| <b>5</b> | <b>Kognitiva in prädiagnostischen Mitteilungen — 61</b>                             |
| 5.1      | Epistemische, Sinnes- und Performativausdrücke — 64                                 |
| 5.2      | Kognitive Kategorien, Konzepte und Operationen — 71                                 |
| <b>6</b> | <b>Interaktiva prädiagnostischer Mitteilungen — 86</b>                              |
| 6.1      | Vorkommen, Initiative, Kombination — 86                                             |
| 6.2      | Patientenreaktionen auf prädiagnostische Mitteilungen — 97                          |
| 6.3      | Ärztliche Folgehandlungen — 108                                                     |

**7 Prädiagnostische Mitteilungen – Fallanalysen im Kontrast — 114**

7.1 Fallanalyse 2: Harnprobleme (UR\_05) — 115

7.1.1 Zusammenfassende Analyse — 124

7.2 Fallanalyse 3: Heiserkeit (IA\_03) — 129

7.2.1 Zusammenfassende Analyse — 140

7.3 Fallanalyse 4: Chlamydien (UR\_13) — 143

7.3.1 Zusammenfassende Analyse — 153

7.4 Zusammenfassung und vergleichende Analyse — 156

**8 Schlussdiskussion — 162**

**9 Literatur — 167**

**Anhang: Transkriptionskonventionen — 177**
